# Supplementary material
Source: publisher site journal article supplement (https://www.dovepress.com/article/478574)
Supplement: Supplementary file 1 [file get_supplementary_file.php]

**Supplementary Information**

**Delivery of avocado seed extract using novel charge-switchable mesoporous silica nanoparticles with galactose surface modified to target sorafenib-resistant hepatocellular carcinoma**

*1Aalok Basu, 1Arunsajee Sae-be, 1Thanaphon Namporn, 2Orasa Suriyaphan, 3Pongtip Sithisarn, 1Jiraporn Leanpolchareanchai, 1Piyaporn Plommaithong, 1Apichat Chatsukit, 4Khanit Sa-ngiamsuntorn, 5Parichart Naruphontjirakul, 1,6Pakatip Ruenraroengsak*

*1*Department of Pharmacy, Faculty of Pharmacy, Mahidol University, Bangkok, Thailand;

*2*Department of Food Chemistry, Faculty of Pharmacy, Mahidol University, Bangkok, Thailand;

*3*Department of Pharmacognosy, Faculty of Pharmacy, Mahidol University, Bangkok, Thailand;

*4*Department of Biochemistry, Faculty of Pharmacy, Mahidol University, Bangkok, Thailand;

*5*Biological Engineering Program, Faculty of Engineering, King Mongkut’s University of Technology Thonburi, Bangkok, Thailand;

*6*Centre of Molecular Targeting and Integrated Drug Development, Faculty of Pharmacy, Mahidol University, Bangkok, Thailand

*Correspondence: Pakatip Ruenraroengsak*

*Division of Pharmaceutical Technology, Department of Pharmacy, Faculty of Pharmacy, Mahidol University, 447 Sri-Ayuthaya Rd, Rajathevi, Bangkok, Thailand, 10400,*

*Phone: +66 (0) 987466661; Email: pakatip.rue@mahidol.ac.th*

**Supplementary Table 1.** List of retention time in LC-MS chromatogram and tentative identification of secondary metabolites of avocado seed extract using references [1,2].

| **No.** | **Rt (min.)** | **MS (m/z)** | **Compound** | **Molecular formula** |
| --- | --- | --- | --- | --- |
| 1 | 5.56 | 299.1137 | Chrysoeriol | C16H12O6 |
| 2 | 6.01 | 337.0924 | 5-*O*-*p*-Coumaroylquinic acid | C16H18O8 |
| 3 | 6.12 | 289.0708 | Catechin | C15H14O6 |
| 4 | 6.34 | 353.0876 | 5-*O*-caffeoyl-quinic acid | C16H18O9 |
| 5 | 6.36 | 180.9729 | Caffeic acid | C9H8O4 |
| 6 | 6.93 | 289.0713 | Epicatechin | C15H14O6 |
| 7 | 7.03 | 306.9378 | Gallocatechin | C15H14O7 |
| 8 | 7.97 | 441.1767 | Catechin gallate | C22H18O10 |
| 9 | 17.47 | 250.1447 | Gallic acid | C7H6O5 |
| 10 | 30. 05 | 325.1832 | (+)-18-Methyl-eicosanoic acid | C21H42O2 |

**Supplementary Table 2.** Hydrodynamic diameter and zeta potential values of nanoparticles at different levels of galactose conjugation

| Galactose: Nanoparticle ratio | Size (nm; mean ±SD) | PDI (mean ±SD) | Zeta potential at 7.4 pH (mV; mean ±SD) | Zeta potential at 5.5 pH (mV; mean ±SD) |
| --- | --- | --- | --- | --- |
| 5: 1 | 336.2 ±11.10 | 0.427 ±0.09 | -35.0 ±2.74 | +2.12 ±0.16 |
| 2:1 | 312.4 ±5.31 | 0.414 ±0.03 | -35.6 ±3.71 | -1.93 ±0.29 |
| 1:1 | 290.7 ±2.05 | 0.367 ±0.02 | -34.7 ±0.50 | +4.66 ±0.09 |
| 1:2 | 224.6 ±2.46 | 0.256 ±0.02 | **-**18**.**2±0.32 | +10.3 ±0.61 |
| 1:5 | 220.4 ±3.28 | 0.271 ±0.04 | -3.94 ±0.34 | +13.76 ±1.51 |

**Supplementary Table 3.** Analysis parameters for cell uptake and cellular distribution using Harmony software (version 5.1) parameters.

| **Nuclei segmentation** | |
| --- | --- |
| Building block | Find Nuclei |
| 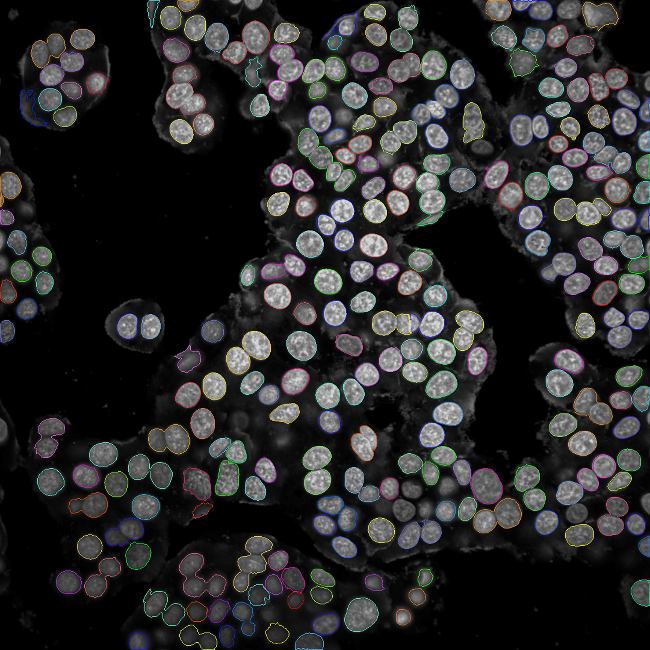 | |
| Channel | HOECHST 33342 |
| Detection method | C |
| Common threshold | 0.2 |
| Area | >35 µm2 |
| Splitting coefficient | 20.4 |
| Individual threshold | 0.3 |
| Contrast | >0.1 |
| Output population | Nuclei |
| **Cytoplasm segmentation** | |
| Building block | Find Cytoplasm |
| 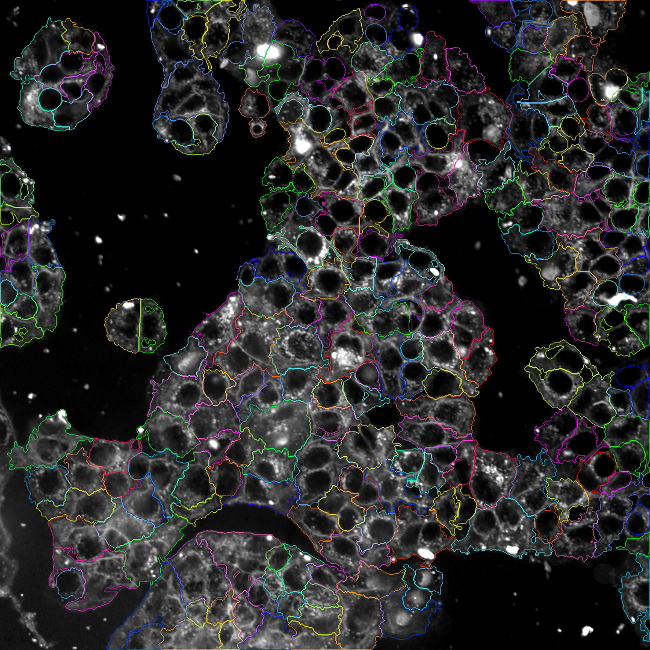 | |
| Channel | Alexa 647 |
| Nuclei | Nuclei |
| Detection method | A |
| Individual threshold | 0.2 |
| **Nanoparticle detection inside nucleus** | |
| Building block | Find Spot |
| 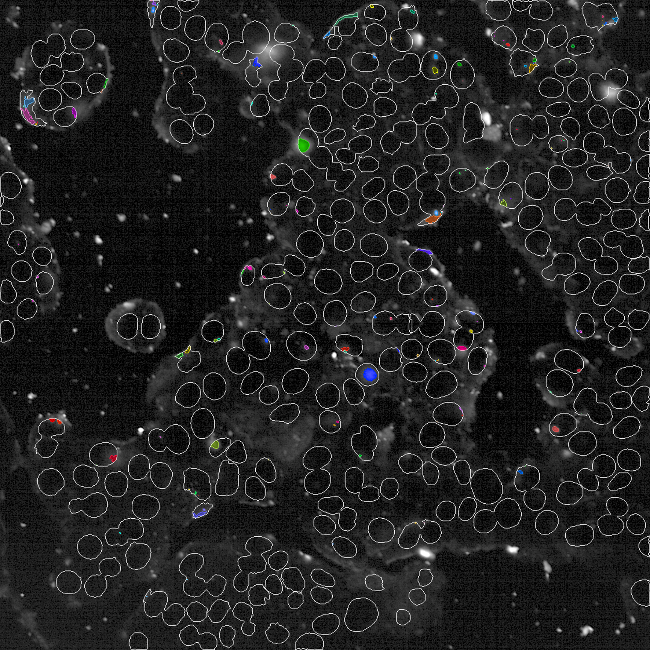 | |
| Channel | Fluorescein (FITC) |
| ROI | Nuclei |
|  | Nucleus |
| Method | B |
| Detection sensitivity | 0.56 |
| Splitting sensitivity | 0.656 |
| Output population | Nanoparticles in nucleus |
| **Nanoparticle detection inside cytoplasm** |  |
| Building block | Find Spot |
| 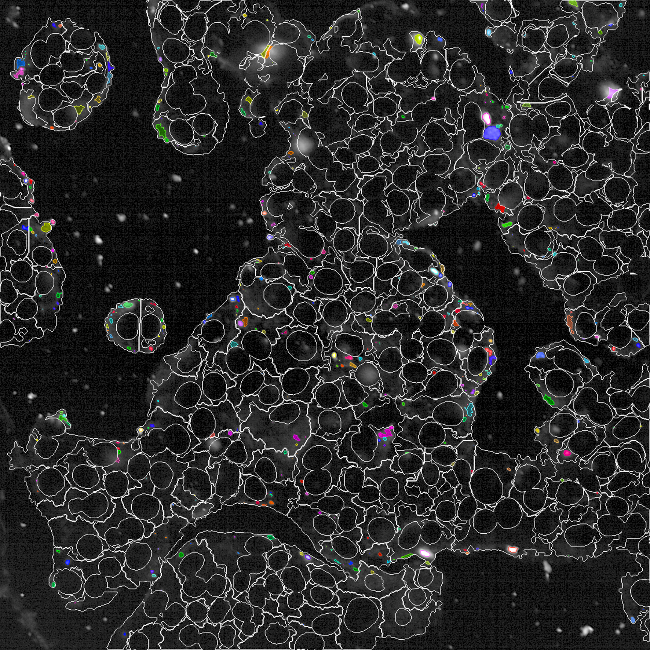 | |
| Channel | Fluorescein (FITC) |
| ROI | Nuclei |
|  | Nucleus |
| Method | B |
| Detection sensitivity | 0.56 |
| Splitting sensitivity | 0.656 |
| Output population | Nanoparticles in nucleus |
| **Define Results** |  |
| Method | Standard Output |
| Nanoparticles in nucleus- Number of objects | Object Count |
| Method | Standard Output |
| Nanoparticles in cytoplasm- Number of objects | Object Count |

**Supplementary Table 4.** Analysis parameters for endosomal escape using Harmony software (version 5.1) parameters.

| **Endolyosome segmentation** | |
| --- | --- |
| Building block | Find Spots |
| 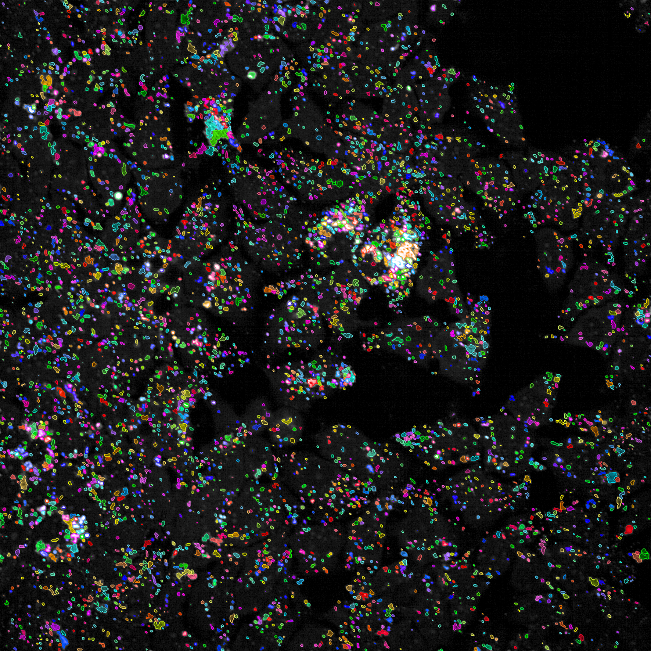 | |
| Channel | Acridine Orange |
| ROI | None |
| Detection method | B |
| Detection sensitivity | 0.5 |
| Splitting sensitivity | 0.5 |
| Splitting coefficient | 20.4 |
| Calculate spot properties |  |
| Output population | Endosome |
| **Cytoplasm segmentation** | |
| Building block | Find Cells |
| 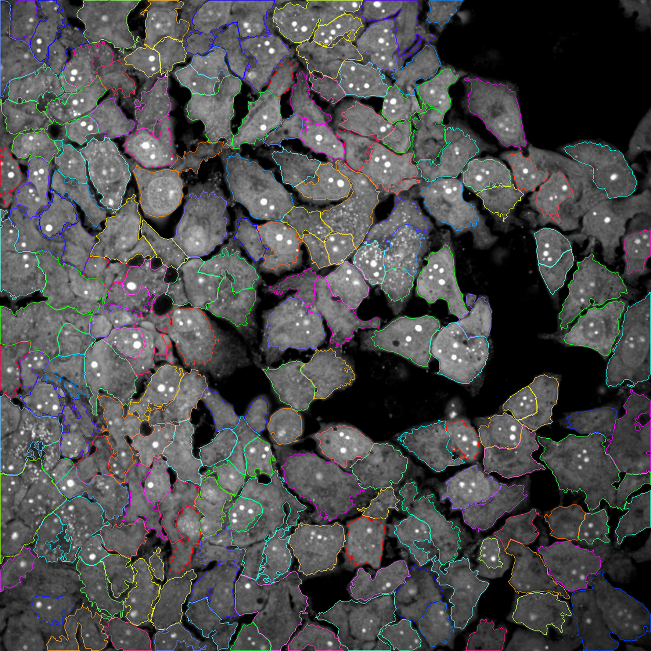 | |
| Channel | Fluorescein (FITC) |
| ROI | None |
| Detection method | M |
| Diameter | 40 µm |
| Splitting sensitivity | 0.4 |
| Common threshold | 0.31 |
| Output population | Cytosol |
| **Endolysosome intensity** | |
| Building block | Calculate Intensity Properties |
| Channel | Acridine Orange |
| Population | Endosome |
| Region | Spot |
| Method | Standard |
| Property prefix | Intensity spot AO |
| **Cytosol intensity** |  |
| Building block | Calculate Intensity Properties |
| Channel | Fluorescein (FITC) |
| Population | Cytosol |
| Region | Cell |
| Method | Standard |
| Property prefix | Intensity cell fluorescein (FITC) |
| **Define Results** |  |
| Method | Formula outputs |
| Formula Output | a/b |
| Variable a | Endosome – number of objects |
| Variable b | Cytosol – number of objects |
| Output name | Endosome per cell |


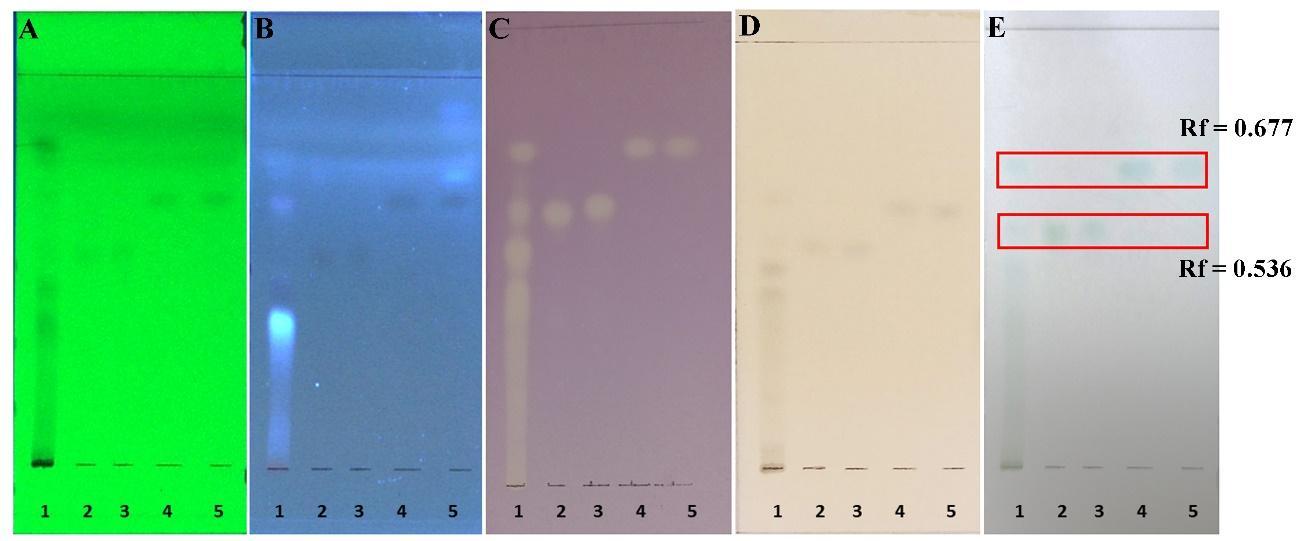


**Supplementary Figure 1.** Thin layer chromatogram of APE as visualized using (A) UV 254 nm and (B) UV 366 nm, before spraying with (C) DPPH reagent, (D) ferric chloride reagent, or (E) DMACA reagent. Standard no. 1=APE (30mg/ml); 2=Procyanidin B1; 3=Procyanidin B2; 4=Epicatechin; 5=Catechin.


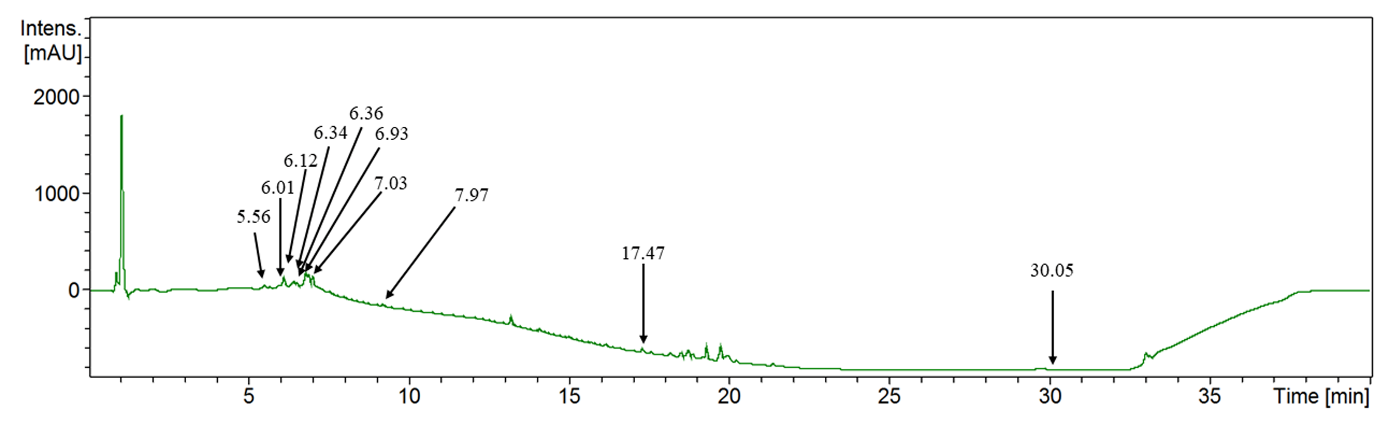
**Supplementary** **Figure 2.** LC-MS (negative mode) chromatogram of avocado seed extract


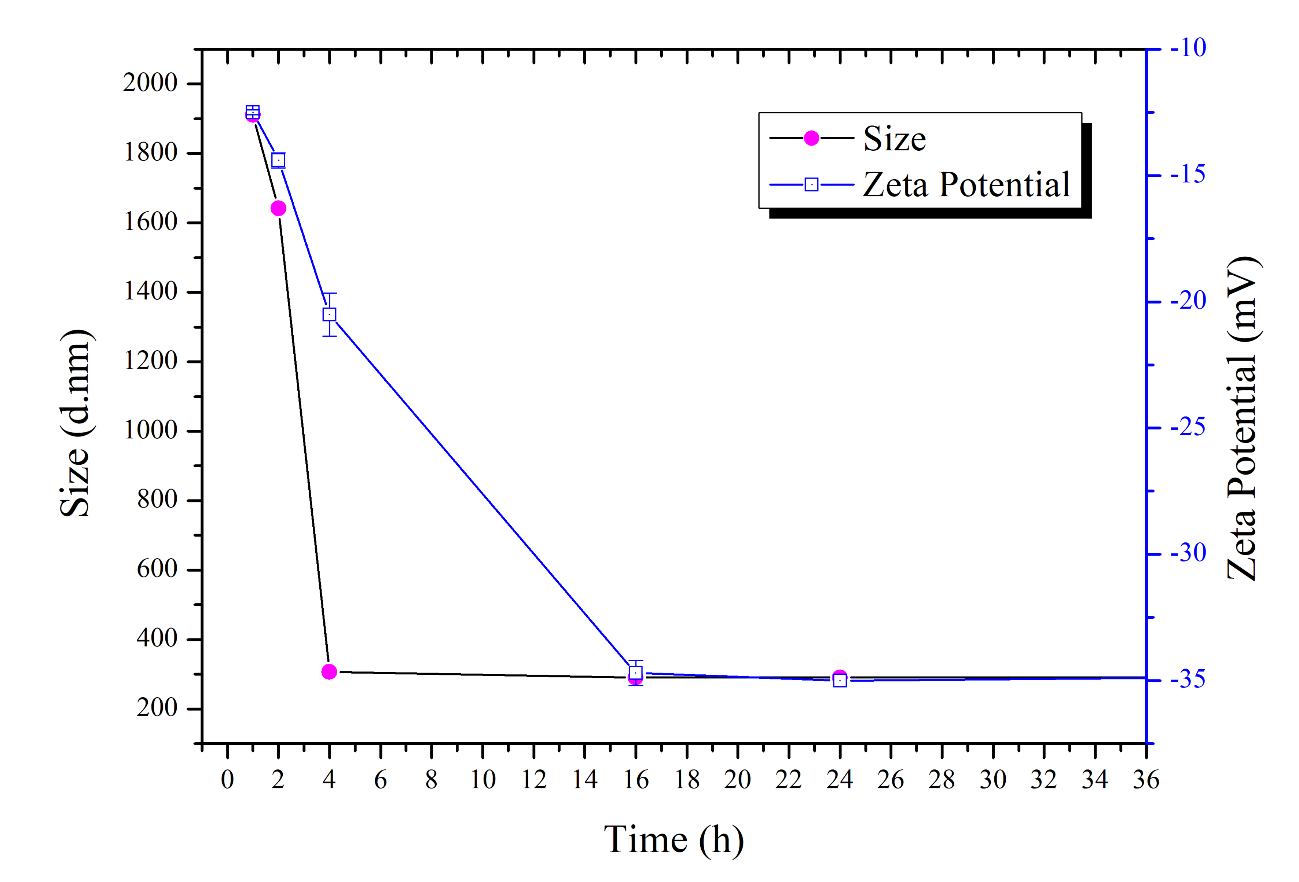


**Supplementary Figure 3.** Effect of time on size (hydrodynamic diameter) and zeta potential of nanoparticles during reductive amination with galactose. A galactose: nanoparticle ratio of 1:2 was used throughout, and the growth of galactose layer on nanoparticle surface was examined using dynamic light scattering. No significant change of size or zeta potential was observed after 16 h of reaction.


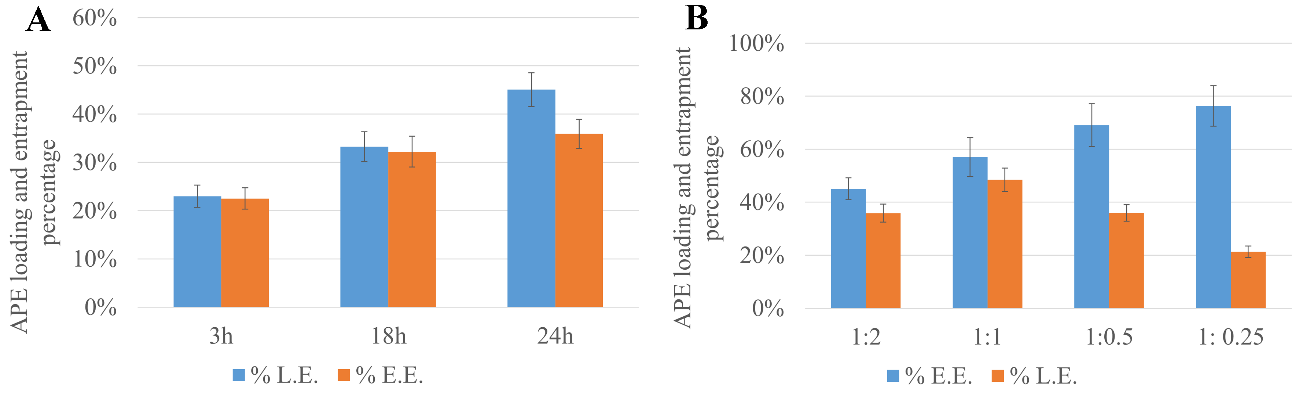


**Supplementary Figure 4.** Optimization APE of loading into nanoparticles (loading efficiency, %LE and entrapment efficiency, %EE) at (A) different time points (3, 18, 24 h), and (B) different nanoparticles-extract mass ratio (1:2, 1:1, 1:0.5, 1:0.25) at 24 h.


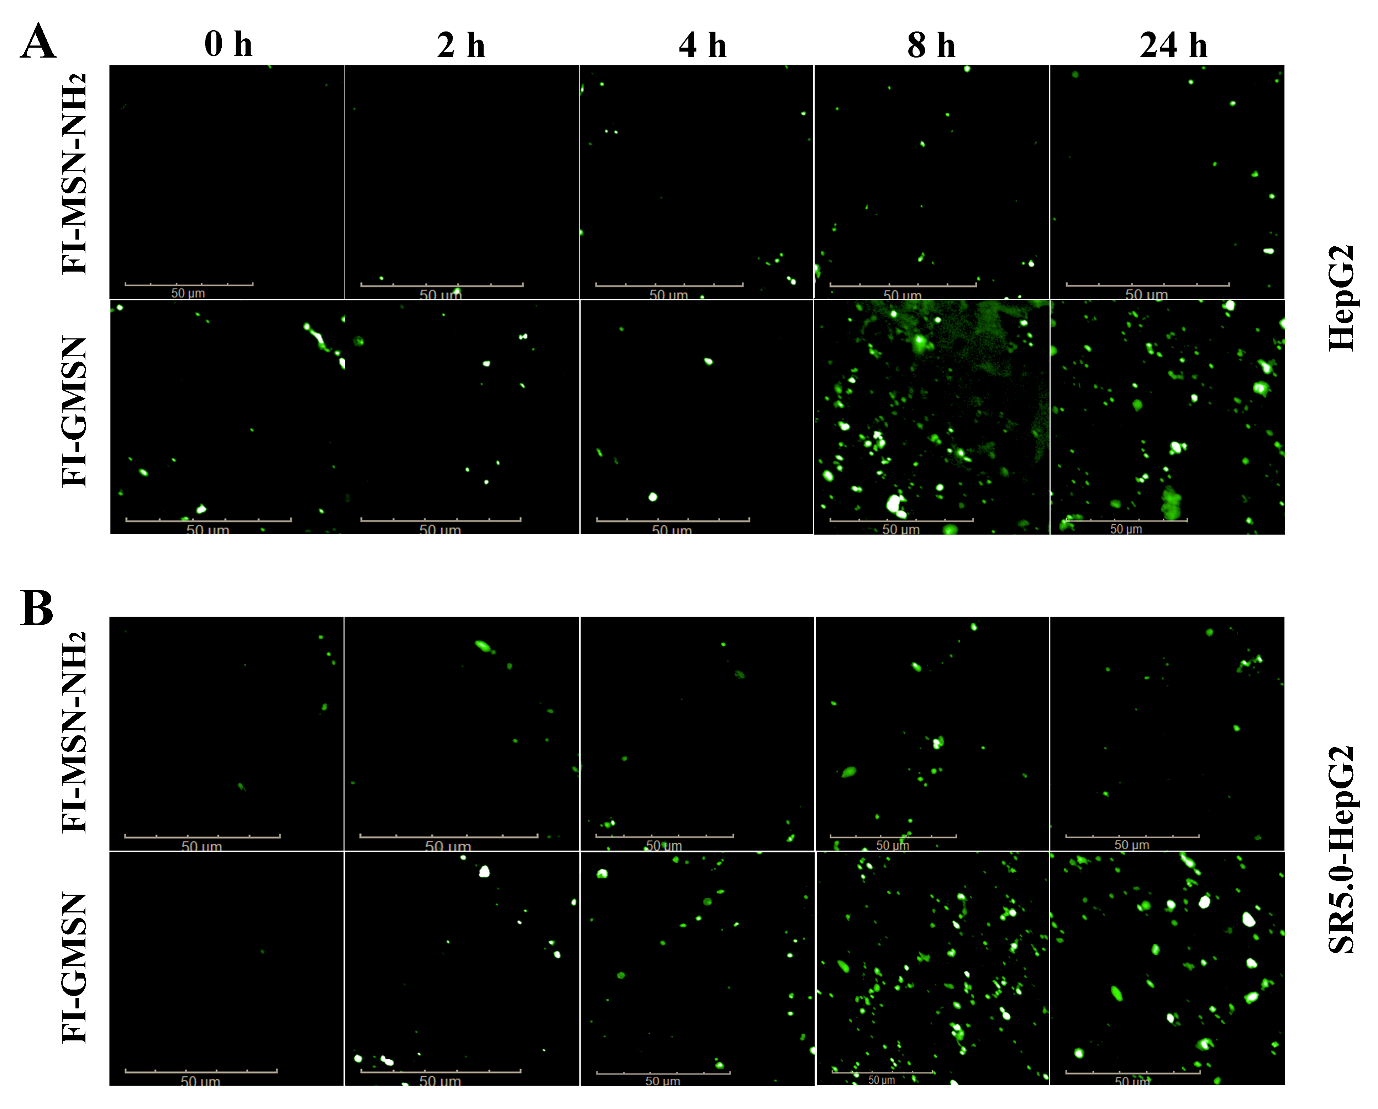


**Supplementary** **Figure 5.** Uptake of MSN-NH2 (green) and GMSN (green) by HepG2, and SR5.0-HepG2 monitored over 24 h using high content imaging. Scale bar is 50 µm.


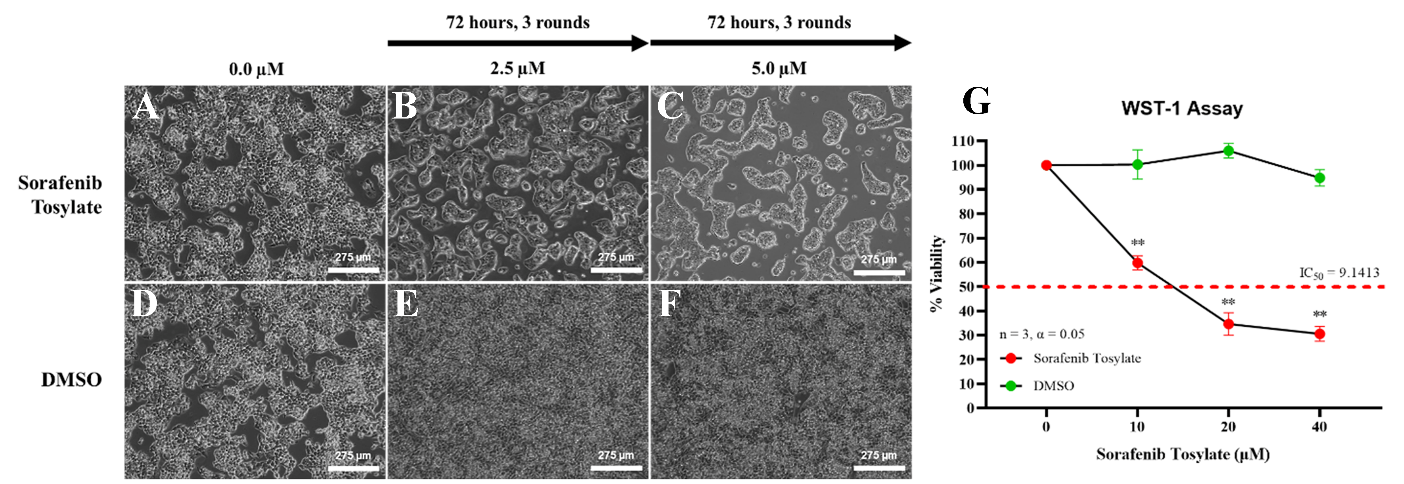


**Supplementary Figure 6.** Morphology of HepG2 cells during the sorafenib (SR)-resistant cell generation. HepG2 cells passaged with (A) 0.0 µM SR, followed by (B) 2.5 µM SR, and with (C) 5.0 µM SR. HepG2 cell treated with (D) the desired concentrations of DMSO containing 0 µM SR solution, (E) 2.5 µM SR and (F) 5.0 µM SR as a solubilizing agent were perform as substance control. (G) WST-1 assay for determining SR5.0-HepG2 cell viability at the different concentrations of sorafenib tosylate or 2 % (v/v) DMSO. Data are presented as mean ± SD (n = 3, *p < 0.05, **p < 0.01, ***p < 0.001).

**References**

1. Younis, I.Y.; Khattab, A.R.; Selim, N.M.; Sobeh, M.; Elhawary, S.S.; Bishbishy, M.H.E. Metabolomics-Based Profiling of 4 Avocado Varieties Using HPLC–MS/MS and GC/MS and Evaluation of Their Antidiabetic Activity. *Sci. Rep.* **2022**, *12*, 1–15, doi:10.1038/s41598-022-08479-4.

2. Rosero, J.C.; Cruz, S.; Osorio, C.; Hurtado, N. Analysis of Phenolic Composition of Byproducts (Seeds and Peels) of Avocado (Persea Americana Mill.) Cultivated in Colombia. *Molecules* **2019**, *24*, doi:10.3390/molecules24173209.
